# Supplementary material
Source: Springer Nature journal article supplement (https://www.springermedizin.de/resource/supplementary/12876_2006_187_MOESM1_ESM.pdf/9438882)
Supplement: MOESM1 [file 9438882]

Z004

NECK  
M/030Y  
-22.0mm  
-7.5deg  
I#23

Omnipaque  
120kV 160mA  
1.0s 10.0mm  
160mAs  
0m1  
01'03"7  
-10.0mm/s  
+ C

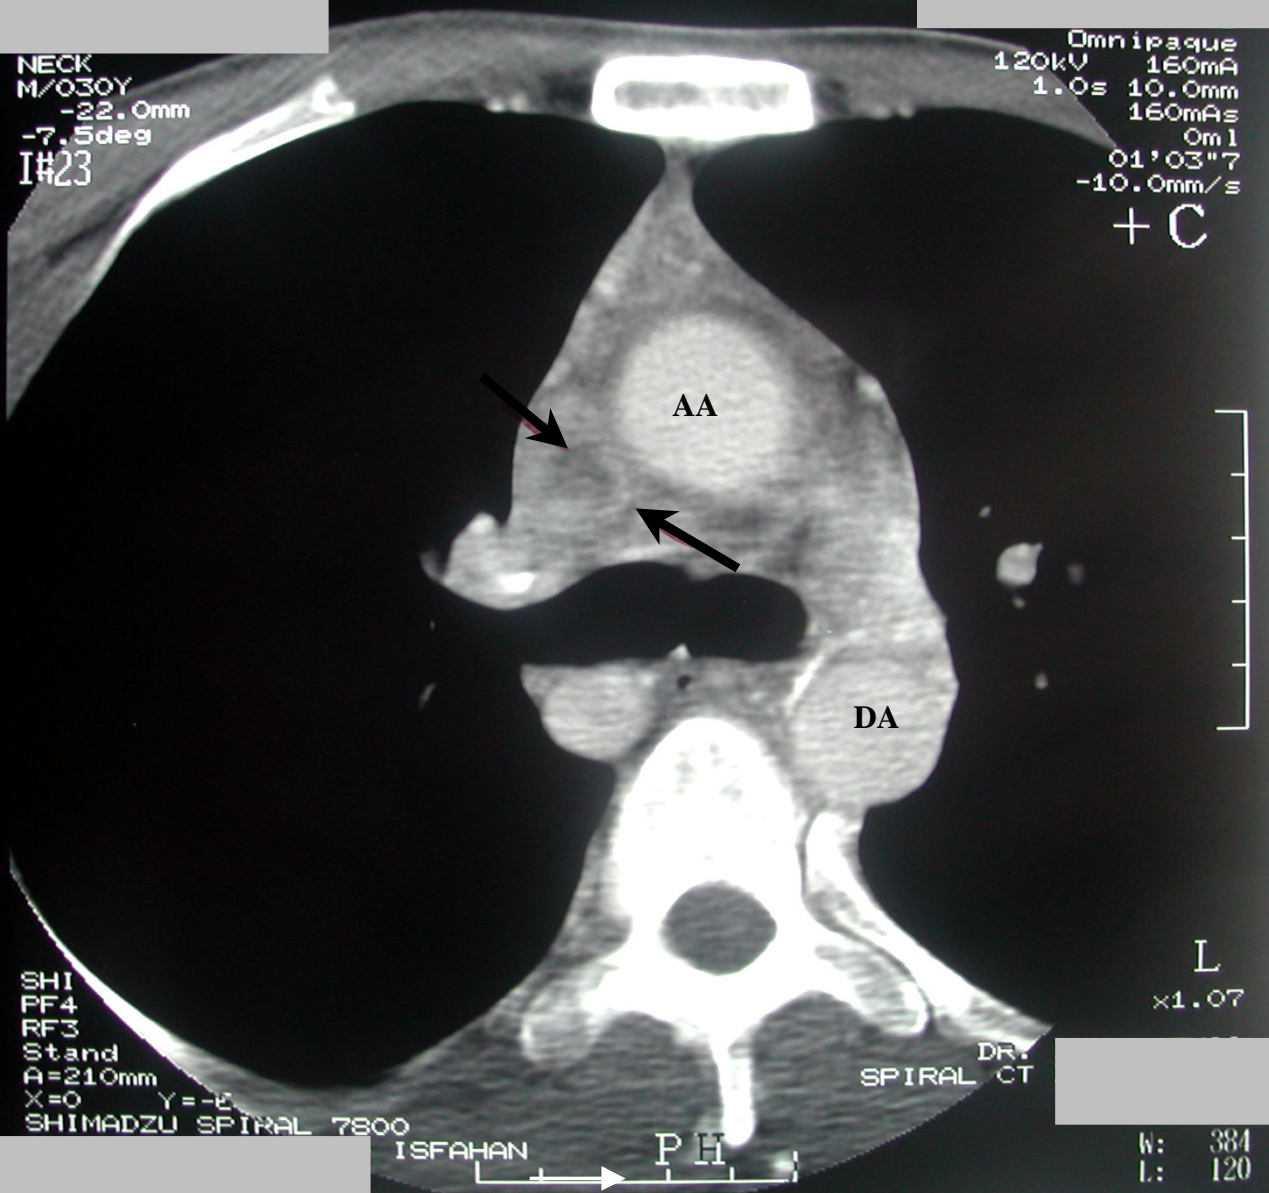

AA

DA

L

×1.07

SHI  
PF4  
RF3  
Stand  
A=210mm  
X=0 Y=-E  
SHIMADZU SPIRAL 7800

DR:  
SPIRAL CT

ISFAHAN

PH

W: 384  
L: 120
